# Supplementary material for: Zinc stannate microcubes with an integrated microheater for low-temperature NO2 detection
Source: Royal Society of Chemistry journal article supplement (doi:10.1039/d2nj02709g), 2022-01-01
Supplement: d2nj02709g1.pdf [file d2nj02709g1.pdf]

**Zinc stannate microcubes with integrated microheater for low-temperature NO<sub>2</sub> detection**

*Nirav Joshi<sup>\*1,2</sup>, Hu Long<sup>3,4</sup>, Pranav Naik<sup>5</sup>, Arvind Kumar<sup>6</sup>, Valmor R. Mastelaro<sup>2</sup>, Osvaldo N. Oliveira Jr<sup>2</sup>, Alex Zettl<sup>4</sup>, Liwei Lin<sup>1</sup>*

<sup>1</sup>Department of Mechanical Engineering, University of California, Berkeley, CA, USA

<sup>2</sup>São Carlos Institute of Physics, University of São Paulo, CP 369, São Carlos 13560-970, São Paulo, Brazil.

<sup>3</sup>Department of Mechatronics Engineering, School of Mechanical Science and Engineering, Huazhong University of Science and Technology, Wuhan, HuBei 430074, China

<sup>4</sup>Department of Physics, University of California Berkeley at Berkeley, Materials Sciences Division, Lawrence Berkeley National Laboratory, Kavli Energy NanoSciences Institute, Berkeley, CA 94720 USA

<sup>5</sup>Department of Physics, Goa University, Taleigao Plateau, Goa, 403206, India.

<sup>6</sup>Department of Physics, Chaman Lal Mahavidyalaya, Haridwar, India.

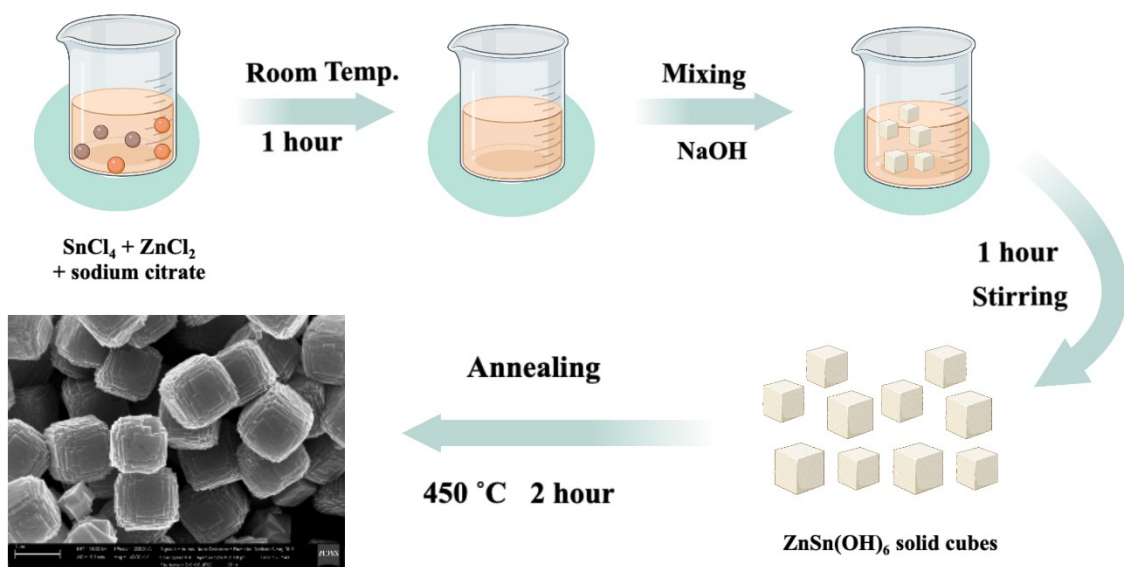

**Figure S1:** Illustration of the synthesis process of ZnSnO<sub>3</sub> microcubes.

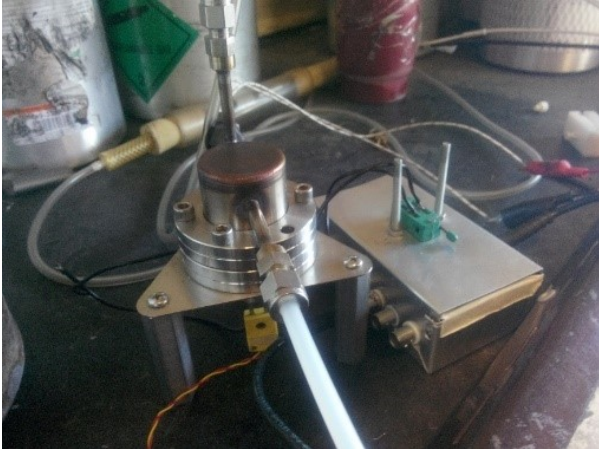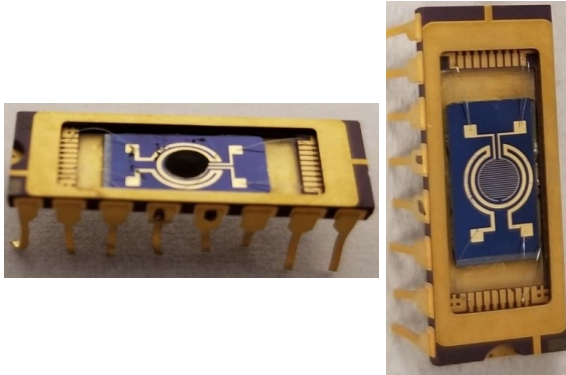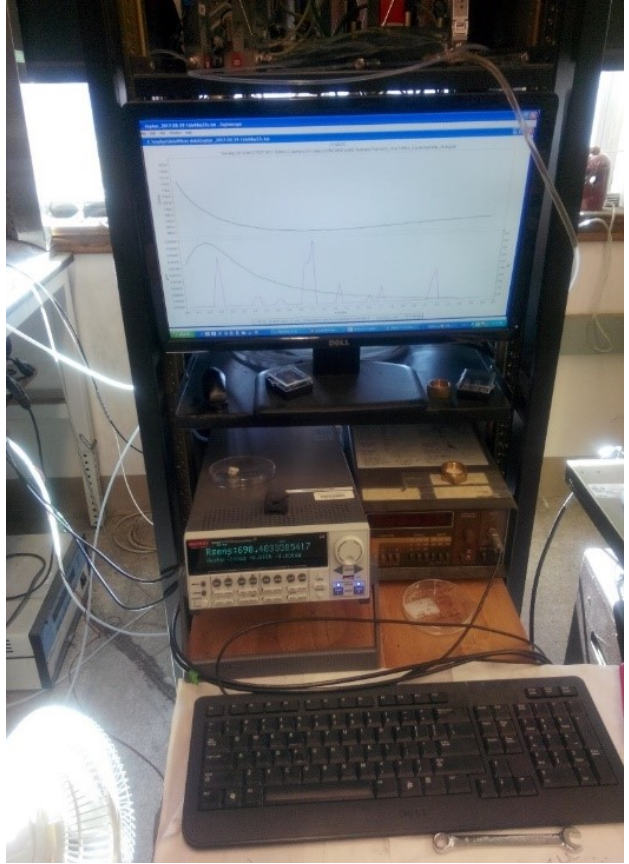

**Figure S2:** Dynamic sensing unit and microsensors with ZnSnO<sub>3</sub> sensing film

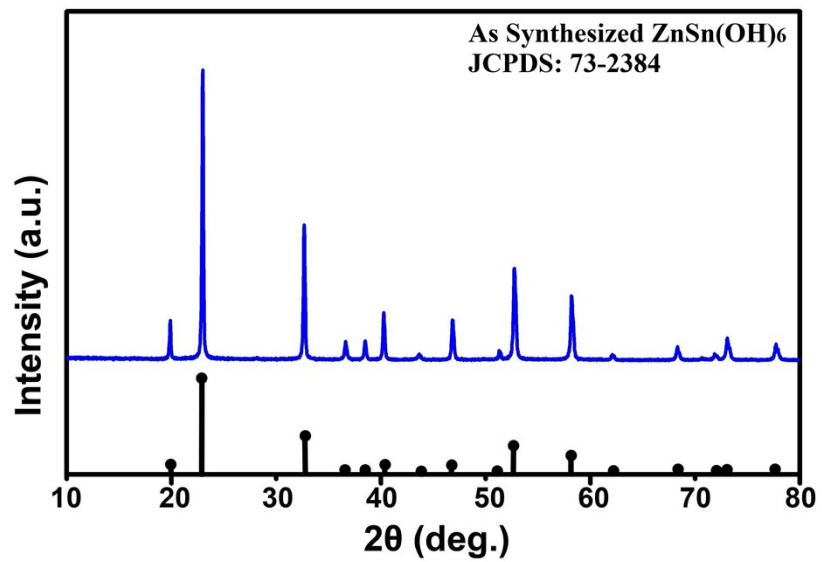

Figure S3: XRD pattern of as-synthesized ZnSn(OH)<sub>6</sub> material.

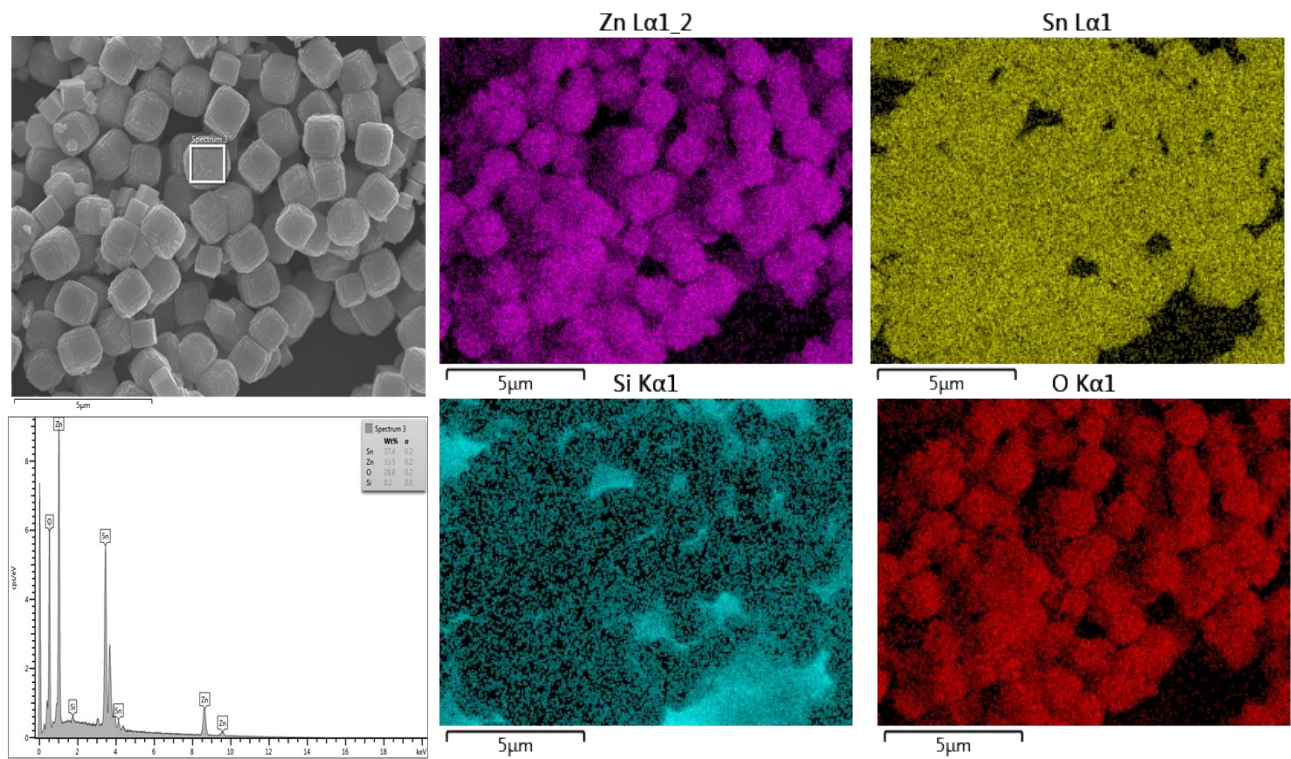

**Figure S4:** EDS spectra and elemental mapping of ZnSnO<sub>3</sub> microcubes

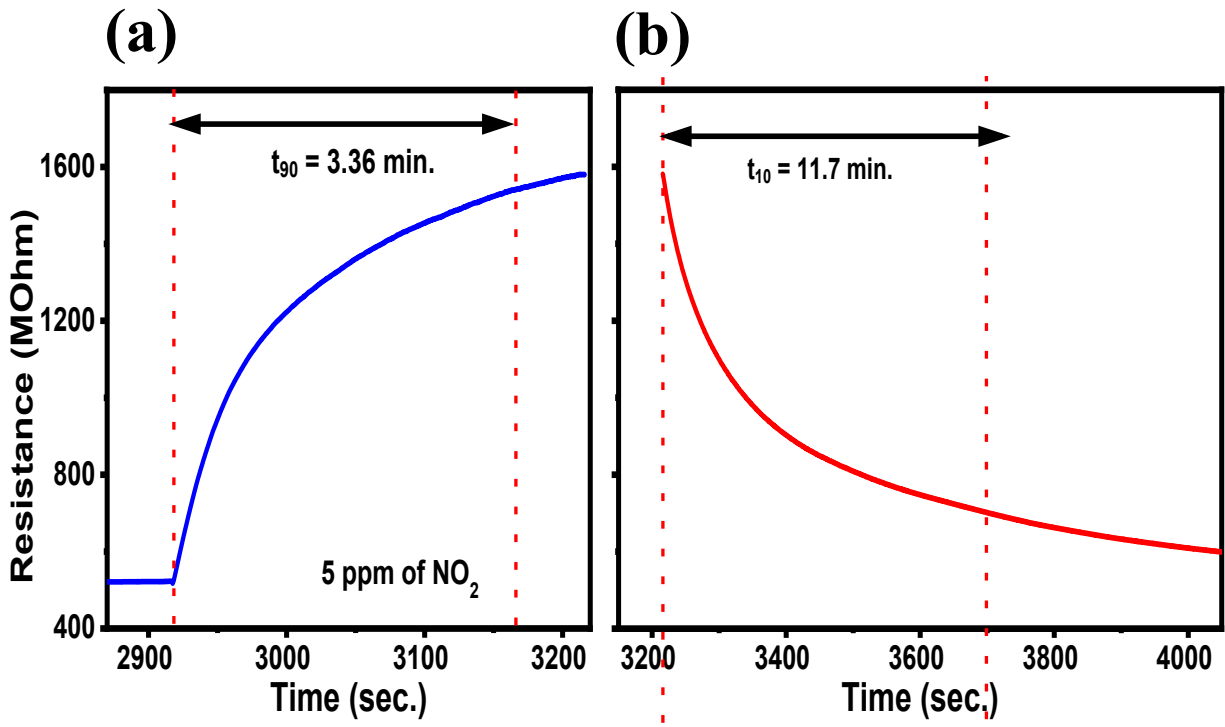

Figure S5 (a) Response and (b) Recovery behavior of ZnSnO<sub>3</sub> sensor to 5 ppm NO<sub>2</sub> at 110 °C.
